# Supplementary material
Source: ML conference proceedings conference paper supplement (https://proceedings.neurips.cc/paper_files/paper/2019/hash/1a638db8311430c6c018bf21e1a0b7fb-Abstract.html)
Supplement: Supplementary file [file 1a638db8311430c6c018bf21e1a0b7fb-Supplemental.zip]

# Supplemental Materials for: Generalization Error Analysis of Quantized Compressive Learning

**Xiaoyun Li\***

Department of Statistics  
Rutgers University  
Piscataway, NJ 08854, USA  
xiaoyun.li@rutgers.edu

**Ping Li**

Cognitive Computing Lab  
Baidu Research  
Bellevue, WA 98004, USA  
liping11@baidu.com

## A Proofs of Theorems

### A.1 Technical Lemmas

**Lemma A1.** [2] Let the losses and estimators be defined as in Theorem 6 under fixed design setting. Let  $\gamma = \text{Var}[y_i]$ ,  $i = 1, \dots, n$ , and  $X$  is fixed. Then the expected risk

$$E_Y[L(\hat{\beta}^*)] - L(\beta^*) \leq \gamma \frac{\text{rank}(X)}{n}.$$

**Lemma A2.** [6] Let  $X = \sum_{i=1}^n X_i$  with possibly dependent  $X_i$ 's.  $Y = \sum_{i=1}^n Y_i$  where  $Y_i$ 's are independent copies of  $X_i$ 's (i.e.  $Y_i$  has same distribution as  $X_i$ ,  $i = 1, \dots, n$ ). If  $B$  is a Chernoff bound on  $\Pr[Y - E[Y] \geq \epsilon]$ , then we have

$$\Pr[X - E[X] \geq \epsilon] \leq B^{\frac{1}{n}}.$$

**Lemma A3.** [4] Let  $(x, y)$  follows standard bi-variate normal distribution with unit variance and covariance  $\rho$ .  $Q$  is a Lloyd-Max quantizer with distortion  $D_Q$ . Then,

$$E[xQ(y)] = (1 - D_Q)\rho.$$

### A.2 Proof of Theorem 3

*Proof.* The proof idea is similar to [3], but we operate in the quantized space which is more complicated. First, we have

$$\begin{aligned} E_{X,Y}[\mathcal{L}(h_Q(x))] &= E_{X \sim \mathcal{X}, Y \sim \eta(X)}[E_{x \sim \mathcal{X}, y \sim \eta(x)}[\mathbb{1}\{h_Q(x) \neq y\} | X, Y]] \\ &= E_{X \sim \mathcal{X}, x \sim \mathcal{X}}[\Pr_{y \sim \eta(x), y_Q^{(1)} \sim \eta(x_Q^{(1)})}[y_Q^{(1)} \neq y | X, x]]. \end{aligned} \quad (1)$$

We can bound the inner probability for any two points  $x, x' \sim \mathcal{X}$  as

$$\begin{aligned} \Pr_{y \sim \eta(x), y' \sim \eta(x')}[y \neq y' | x, x'] &= \eta(x)(1 - \eta(x')) + \eta(x')(1 - \eta(x)) \\ &= 2\eta(x)(1 - \eta(x)) + (\eta(x) - \eta(x'))(2\eta(x) - 1) \\ &\leq 2\eta(x)(1 - \eta(x)) + \|\eta(x) - \eta(x')\|, \end{aligned} \quad (2)$$

by the definition of  $\eta(x)$ . Here we use the fact  $|2\eta(x) - 1| \leq 1$ . Combining (2) and (1) we have

$$E_{X,Y}[\mathcal{L}(h_Q(x))] \leq E_{X \sim \mathcal{X}, x \sim \mathcal{X}}[2\eta(x)(1 - \eta(x)) + \|\eta(x) - \eta(x_Q^{(1)})\|].$$

Notice from a classical result that

$$L(h^*(x)) = \min\{\eta(x), 1 - \eta(x)\},$$

---

\*The work of Xiaoyun Li was conducted during the internship at Baidu Research.

we obtain

$$E_{X,Y}[\mathcal{L}(h_Q(x))] \leq 2\mathcal{L}(h^*(x)) + E_{X,Y,x \sim \mathcal{X}}[\|\eta(x) - \eta(x_Q^{(1)})\|].$$

The first term is the Bayes risk, and it remains to bound the second term. By Theorem 1, given that  $k = O(\omega^{-2}(\gamma(\mathcal{T})^2 + \log(2/\delta)))$ , with probability  $1 - \delta$  we have

$$(1 - \omega)\|x - y\|^2 \leq \left\| \frac{1}{\sqrt{k}} R^T x - \frac{1}{\sqrt{k}} R^T y \right\|^2 \leq (1 + \omega)\|x - y\|^2, \forall x, y \in \mathcal{X}. \quad (3)$$

Denote this event  $\Omega$ . Now we proceed our analysis in  $\Omega$  (with high probability). The space of projected samples  $S_R = \{\frac{1}{\sqrt{k}} R^T x_1, \dots, \frac{1}{\sqrt{k}} R^T x_n\}$  is now bounded by

$$u_R = \left\| \frac{1}{\sqrt{k}} R^T x \right\| \leq \sqrt{1 + \omega},$$

by taking  $y = 0$  in (3). Therefore,  $S_R \subset [-u_R, u_R]^k$ . Now we cover  $[-u_R, u_R]$  by  $N_C = (2u_R/\epsilon)^k$  boxes with length  $\epsilon$ . For the test sample  $x$ , let  $B_\epsilon(x)$  be the box containing  $\frac{1}{\sqrt{k}} R^T x$ . In the event  $\Omega$ , we have

$$\begin{aligned} E_{X,Y,x}[\|\eta(x) - \eta(x_Q^{(1)})\| | \Omega] &= E_{X,Y,x}[\|\eta(x) - \eta(x_Q^{(1)})\| | \Omega, V] Pr(V) \\ &\quad + E_{X,Y,x}[\|\eta(x) - \eta(x_Q^{(1)})\| | \Omega, V^c] Pr(V^c), \end{aligned}$$

where the event  $V = \{B_\epsilon(x) \cap S_R(X) = \emptyset\}$ ,  $V^c$  its complement, with  $S_R(X) = \{\frac{1}{\sqrt{k}} R^T x_1, \dots, \frac{1}{\sqrt{k}} R^T x_n\}$  the projected samples. By Lemma 19.2 in [5], we have

$$Pr(V) \leq N_C/ne.$$

Thus,

$$\begin{aligned} E_{X,Y,x}[\|\eta(x) - \eta(x_Q^{(1)})\| | \Omega] &\leq \frac{N_C}{ne} + E_{X,Y,x}[\|\eta(x) - \eta(x_Q^{(1)})\| | \Omega, V^c] \\ &\leq \frac{N_C}{ne} + L \cdot E_{X,Y,x}[\|x - x_Q^{(1)}\| | \Omega, V^c] \\ &\leq \frac{N_C}{ne} + \frac{L}{\sqrt{1 - \omega}} E_{X,Y,x}[\left\| \frac{1}{\sqrt{k}} R^T x - \frac{1}{\sqrt{k}} R^T x_Q^{(1)} \right\| | V^c], \end{aligned}$$

where the second line is because  $\eta(x)$  is  $L$ -Lipschitz and the last line is due to (3).

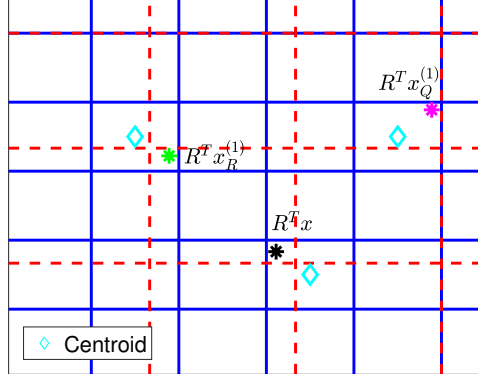

Figure 1: An illustration of bounding the distance in projected space  $S_R$  with two covers. For simplicity we omit the scaling term  $\frac{1}{\sqrt{k}}$ . Boxes resulted from red dash lines are the  $\epsilon$ -cover constructed by hand, and boxes surrounded by blue solid lines are induced cover by  $Q$ .

To bound the second term, we consider another cover of  $S_R$  which is intrinsically induced by the borders of  $Q$ . Denote  $x_R^{(1)}$  as the nearest point of  $x$  in the projected space. In this case, we know

that  $\|\frac{1}{\sqrt{k}}R^Tx - \frac{1}{\sqrt{k}}R^Tx_Q^{(1)}\| \leq \epsilon\sqrt{k}$ . However,  $\|\frac{1}{\sqrt{k}}R^Tx - \frac{1}{\sqrt{k}}R^Tx_Q^{(1)}\|$  cannot be bounded in this way, due to the discretization of quantizing function  $Q$ . In a simple example (Figure 1), assume we only have 3 points in a 2-D case. Denote the centroids of these 3 points respectively as  $\mu(\frac{1}{\sqrt{k}}R^Tx)$ ,  $\mu(\frac{1}{\sqrt{k}}R^Tx_R^{(1)})$  and  $\mu(\frac{1}{\sqrt{k}}R^Tx_Q^{(1)})$ . In this plot,  $V^c$  is obviously satisfied since there are two points in the same  $\epsilon$ -box. Now the green point ( $\frac{1}{\sqrt{k}}R^Tx_Q^{(1)}$ ) is closer to black point ( $\frac{1}{\sqrt{k}}R^Tx_R^{(1)}$ ) in the space of  $S_R$ , but after quantization, the nearest neighbor returned changes to the pink point ( $\frac{1}{\sqrt{k}}R^Tx_Q^{(1)}$ ), since  $\mu(\frac{1}{\sqrt{k}}R^Tx_Q^{(1)})$  lies closer to  $\mu(\frac{1}{\sqrt{k}}R^Tx)$  than  $\mu(\frac{1}{\sqrt{k}}R^Tx_R^{(1)})$ . However,  $\|\frac{1}{\sqrt{k}}R^Tx - \frac{1}{\sqrt{k}}R^Tx_Q^{(1)}\|$  might be greater than  $\epsilon\sqrt{2}$ .

Note that for uniform quantizer, the distances between nearby reconstruction levels all equal to  $\Delta$ , and the distances between consecutive borders (view  $-\sqrt{1-\omega}$  and  $\sqrt{1-\omega}$  as borders too) are upper bounded by  $g_Q(-\sqrt{1-\omega}, \sqrt{1-\omega})$ . Using triangle inequality, we get

$$\begin{aligned} \|\frac{1}{\sqrt{k}}R^Tx - \frac{1}{\sqrt{k}}R^Tx_Q^{(1)}\|V^c &\leq \|\frac{1}{\sqrt{k}}R^Tx - \mu(\frac{1}{\sqrt{k}}R^Tx)\| + \|\frac{1}{\sqrt{k}}R^Tx_Q^{(1)} - \mu(\frac{1}{\sqrt{k}}R^Tx_Q^{(1)})\| \\ &\quad + \|\mu(\frac{1}{\sqrt{k}}R^Tx) - \mu(\frac{1}{\sqrt{k}}R^Tx_Q^{(1)})\|V^c \\ &\leq \frac{\Delta\sqrt{k}}{2} + \frac{\Delta\sqrt{k}}{2} + \|\mu(\frac{1}{\sqrt{k}}R^Tx) - \mu(\frac{1}{\sqrt{k}}R^Tx_Q^{(1)})\|V^c. \end{aligned}$$

To bound the last term, we need to find out that given two points  $a, b$  in a same  $\epsilon$ -box, how large the distance between their quantized centroids  $\mu(a), \mu(b)$  can be. We proceed by noticing that for a given  $B_\epsilon(x)$  with any  $\epsilon$ , the maximum number of different  $Q$ -boxes that can be contained (perhaps partially) on the diagonal of  $B_\epsilon(x)$  is equal to  $\lfloor \frac{\epsilon}{g_Q} \rfloor + 2$ . The largest distance between the centroids occurs when two points fall into the two regions on the diagonal endpoints (as black and green stars in Figure 1), which equals to  $(\lfloor \frac{\epsilon}{g_Q} \rfloor + 1)\Delta\sqrt{k}$ . Therefore, we have

$$\|\mu(\frac{1}{\sqrt{k}}R^Tx) - \mu(\frac{1}{\sqrt{k}}R^Tx_Q^{(1)})\|V^c \leq (\lfloor \frac{\epsilon}{g_Q} \rfloor + 1)\Delta\sqrt{k} \leq (\frac{\epsilon\Delta}{g_Q} + \Delta)\sqrt{k},$$

where for simplicity we write  $g_Q$  instead of  $g_Q(-\sqrt{1-\omega}, \sqrt{1-\omega})$ . Hence, we get the worst case bound

$$E_{X,Y,x}[\|\frac{1}{\sqrt{k}}R^Tx - \frac{1}{\sqrt{k}}R^Tx_Q^{(1)}\|V^c] \leq (\frac{\epsilon\Delta}{g_Q} + 2\Delta)\sqrt{k}.$$

Combining with previous result, we obtain

$$E_{X,Y,x}[\|\eta(x) - \eta(x_Q^{(1)})\|\Omega] \leq \frac{N_C}{ne} + \frac{L\Delta\epsilon\sqrt{k}}{g_Q\sqrt{1-\omega}} + \frac{2L\Delta\sqrt{k}}{\sqrt{1-\omega}}.$$

Now we choose  $\epsilon$  to minimize the RHS. Let  $f(\epsilon) = \frac{(\sqrt{1+\omega}/\epsilon)^k}{ne} + \frac{L\Delta\epsilon\sqrt{k}}{g_Q\sqrt{1-\omega}}$ . Following the standard technique, we take the derivative for  $f$  with respect to  $\epsilon$  and set it to zero, which yields

$$\epsilon^* = (2\sqrt{1+\omega})^{\frac{k}{k+1}} (\frac{L\Delta}{g_Q\sqrt{1-\omega}} ne)^{-\frac{1}{k+1}} \sqrt{k}^{\frac{1}{k+1}}.$$

Plugging in the expression and after some calculation we get

$$E_{X,Y,x}[\|\eta(x) - \eta(x_Q^{(1)})\|\Omega] \leq (\frac{2L\Delta}{g_Q} \sqrt{\frac{1+\omega}{1-\omega}})^{\frac{k}{k+1}} (ne)^{-\frac{1}{k+1}} \sqrt{k} (\sqrt{k}^{-\frac{2k+1}{k+1}} + \sqrt{k}^{\frac{1}{k+1}}).$$

Following [3], we have  $2^{\frac{k}{k+1}} (\sqrt{k}^{-\frac{2k+1}{k+1}} + \sqrt{k}^{\frac{1}{k+1}}) \leq 2\sqrt{2}$ . Replacing the terms and combining all parts together, the proof is complete.  $\square$

### A.3 Proof of Theorem 4

*Proof.* The proof is based on the probability that  $x_Q^{(1)}$  is different from  $x^{(1)}$ . First we have

$$\begin{aligned} E_{X,Y,R}[\mathcal{L}(h_Q(x))] &= E_{X,Y}[E_{x,y,R}[\mathbb{1}\{h_Q(x) \neq y\}|X,Y]] \\ &= E_{X,Y}\{E_{x,y,R}[\mathbb{1}\{h_S(x) \neq y\}\mathbb{1}\{h_Q(x) = h_S(x)\} \\ &\quad + \mathbb{1}\{h_S(x) = y\}\mathbb{1}\{h_Q(x) \neq h_S(x)\}|X,Y]\} \\ &\leq E_{X,Y}\{E_{x,y,R}[\mathbb{1}\{h_S(x) \neq y\} + \mathbb{1}\{h_Q(x) \neq h_S(x)\}|X,Y]\} \\ &\triangleq A + B. \end{aligned}$$

We recognize the term  $A$  is simply the risk of data space NN classifier,  $A = E_{X,Y}[\mathcal{L}(h_S(x))]$ . It suffices to study term  $B$ . Note that

$$\begin{aligned} B &= E_{X \sim \mathcal{X}, x \sim \mathcal{X}, y^{(1)} \sim \eta(x^{(1)}), y_Q^{(1)} \sim \eta(x_Q^{(1)}), R}[\mathbb{1}\{y_Q^{(1)} \neq y^{(1)}\}] \\ &= E_{X,x}\{Pr_{y^{(1)} \sim \eta(x^{(1)}), y_Q^{(1)} \sim \eta(x_Q^{(1)}), R}[x_Q^{(1)} \neq x^{(1)}, y_Q^{(1)} \neq y^{(1)}|X,x]\} \\ &\leq E_{X,x}\{Pr_R[x_Q^{(1)} \neq x^{(1)}|X,x]\} \\ &\triangleq E_{X,x}\{P_c\}, \end{aligned}$$

where the second line is because  $y_R^{(1)} \neq y^{(1)}$  implies that  $x_R^{(1)} \neq x^{(1)}$ . For a fixed  $X$  and  $x$ , we denote the set  $\mathcal{G} = X/x^{(1)}$ . Then for the inner probability, we have

$$\begin{aligned} P_c &= \sum_{i: x_i \in \mathcal{G}} Pr_R[x_Q^{(1)} = x_i|X,x] \\ &= \sum_{i: x_i \in \mathcal{G}} Pr[\bigcap_{x_j \neq x_i} \{\hat{\rho}_Q(x, x_i) \geq \hat{\rho}_Q(x, x_j)\}|X,x] \\ &\leq \sum_{i: x_i \in \mathcal{G}} Pr[\hat{\rho}_Q(x, x_i) \geq \hat{\rho}_Q(x, x^{(1)})|X,x] \end{aligned} \quad (4)$$

due to the equivalence of inner product and Euclidean distance estimation. Under the asymptotic assumption  $k \rightarrow \infty$ , by Central Limit Theorem (CLT) we know that for any  $x, y \in X$ ,

$$\hat{\rho}_Q(x, y) \sim N(\alpha \rho_{x,y}, \frac{\sigma_{x,y}^2}{k}),$$

for  $\sigma_{x,y} = Var[Q(r^T x)^T Q(r^T y)]$  a fixed constant given  $x, y$ . Here  $r$  is a column of  $R$ . Next, we obtain for  $\forall i, j$ ,

$$\hat{\rho}_Q(x, x_i) - \hat{\rho}_Q(x, x_j) \sim N(\alpha(\rho_{x,x_i} - \rho_{x,x_j}), \sigma_{x,x_i}^2 + \sigma_{x,x_j}^2 - 2Corr(\hat{\rho}_Q(x, x_i), \hat{\rho}_Q(x, x_j))\sigma_{x,x_i}\sigma_{x,x_j}).$$

Therefore,

$$\begin{aligned} Pr[\hat{\rho}_Q(x, x_i) \geq \hat{\rho}_Q(x, x_j)] &= Pr[\hat{\rho}_Q(x, x_i) - \hat{\rho}_Q(x, x_j) \geq 0] \\ &= \Phi\left(\frac{\sqrt{k}\alpha(\rho_{x,x_i} - \rho_{x,x_j})}{\sqrt{\sigma_{x,x_i}^2 + \sigma_{x,x_j}^2 - 2Corr(\hat{\rho}_Q(x, x_i), \hat{\rho}_Q(x, x_j))\sigma_{x,x_i}\sigma_{x,x_j}}}\right) \\ &= \Phi\left(\frac{\sqrt{k}(\rho_{x,x_i} - \rho_{x,x_j})}{\sqrt{\xi_{x,x_i}^2 + \xi_{x,x_j}^2 - 2Corr(\hat{\rho}_Q(x, x_i), \hat{\rho}_Q(x, x_j))\xi_{x,x_i}\xi_{x,x_j}}}\right), \end{aligned}$$

since by the definition of debiased variance we have  $\xi_{x,x_i}^2 = \frac{\sigma_{x,x_i}^2}{\alpha^2}$ . Now plugging above equation into (4), we have

$$B = E_{X,x}\left[\sum_{i: x_i \in \mathcal{G}} \Phi\left(\frac{\sqrt{k}(\cos(x, x_i) - \cos(x, x^{(1)}))}{\sqrt{\xi_{x,x_i}^2 + \xi_{x,x^{(1)}}^2 - 2Corr(\hat{\rho}_Q(x, x_i), \hat{\rho}_Q(x, x^{(1)}))\xi_{x,x_i}\xi_{x,x^{(1)}}}}\right)\right],$$

by noting that  $\rho_{x,x_i} = \cos(x, x_i)$ . Combining parts together, we get the result as required.  $\square$

#### A.4 Proof of Lemma 1

*Proof.* Denote the random projection matrix  $R \in \mathbb{R}^{d \times k}$ . Recall that the estimates of  $\rho_{xy}$  and  $\rho_{xz}$  are

$$\hat{\rho}_R(x, y) = \frac{x^T R R^T y}{k}, \quad \hat{\rho}_R(x, z) = \frac{x^T R R^T z}{k}.$$

Denote the columns of  $R$  as  $[r_1, \dots, r_k]$ , we have

$$\begin{aligned} & E[\hat{\rho}_R(x, y) \hat{\rho}_R(x, z)] \\ &= \frac{1}{k^2} E[x R R^T y^T x R R^T z^T] \\ &= \frac{1}{k^2} [\langle x, r_1 \rangle, \dots, \langle x, r_k \rangle] \begin{bmatrix} \langle y, r_1 \rangle \\ \vdots \\ \langle y, r_k \rangle \end{bmatrix} [\langle x, r_1 \rangle, \dots, \langle x, r_k \rangle] \begin{bmatrix} \langle z, r_1 \rangle \\ \vdots \\ \langle z, r_k \rangle \end{bmatrix} \\ &= \frac{1}{k^2} \left( \sum_{i=1}^k \langle x, r_i \rangle \langle y, r_i \rangle \right) \cdot \left( \sum_{i=1}^k \langle x, r_i \rangle \langle z, r_i \rangle \right) \\ &= \frac{1}{k^2} \left[ \sum_{i=1}^k \left( \sum_{p=1}^d x_p r_{ip} \right) \left( \sum_{q=1}^d y_q r_{iq} \right) \right] \cdot \left[ \sum_{j=1}^k \left( \sum_{s=1}^d x_s r_{js} \right) \left( \sum_{t=1}^d y_t r_{jt} \right) \right] \\ &= \frac{1}{k^2} \sum_{i=1}^k \sum_{j=1}^k \left[ \sum_{p=1}^d \sum_{q=1}^d \sum_{s=1}^d \sum_{t=1}^d x_p y_q x_s z_t E[r_{ip} r_{iq} r_{js} r_{jt}] \right] \\ &= \frac{1}{k^2} \left\{ \sum_{i=1}^k \sum_{j \neq i}^k \left[ \sum_{p=1}^d \sum_{q=1}^d \sum_{s=1}^d \sum_{t=1}^d x_p y_q x_s z_t E[r_{ip} r_{iq} r_{js} r_{jt}] \right] + \sum_{i=1}^k \left[ \sum_{p=1}^d \sum_{q=1}^d \sum_{s=1}^d \sum_{t=1}^d x_p y_q x_s z_t E[r_{ip} r_{iq} r_{is} r_{it}] \right] \right\} \\ &\triangleq A + B. \end{aligned}$$

For the first term  $A$ , since  $i \neq j$  and all entries of  $R$  are *i.i.d.* standard normal, the expectation is non-zero only when  $p = q$  and  $s = t$ . Also note the each row vector  $r_i$  and  $r_j$  are independent. Consequently we obtain

$$A = \frac{k(k-1)}{k^2} \left( \sum_{p=1}^d \sum_{s=1}^d x_p y_p x_s z_s \right) = \frac{k-1}{k} \langle x, y \rangle \cdot \langle x, z \rangle = \frac{k-1}{k} \rho_{xy} \rho_{xz}.$$

For term  $B$ , we note that the expectation is non-zero when: (i)  $p = q$  and  $s = t$ ; (ii)  $p = s$  and  $q = t$ ; or (iii)  $p = t$  and  $q = s$ . In these cases, when  $p, q, s, t$  are not all equal, the expected value is simply  $E[r_{ip}^2 r_{iq}^2] = 1$ . When  $p = q = s = t$ , the expected value is  $E[r_{ip}^4] = 3$ . Therefore we have

$$\begin{aligned} B &= \frac{k}{k^2} \left\{ \sum_{p=1}^d \sum_{s=1}^d x_p y_p x_s z_s + \sum_{p=1}^d \sum_{q=1}^d x_p y_q x_p z_q + \sum_{p=1}^d \sum_{q=1}^d x_p y_q x_q z_p - 2 \times 3 \sum_{p=1}^d x_p y_p x_p z_p \right\} \\ &= \frac{1}{k} [\langle x, y \rangle \cdot \langle x, z \rangle + \|x\|^2 \langle y, z \rangle + \langle x, y \rangle \cdot \langle x, z \rangle + 3 \times 2 \sum_{p=1}^d x_p y_p x_p z_p - 2 \times 3 \sum_{p=1}^d x_p y_p x_p z_p] \\ &= \frac{1}{k} (\rho_{yz} + 2\rho_{xy} \rho_{xz}), \end{aligned}$$

where the first line is due to the fact that we count the case  $p = q = s = t$  for three times. Now putting parts together, we have

$$\begin{aligned} \text{Cov}(\hat{\rho}_R(x, y), \hat{\rho}_R(x, z)) &= \frac{1}{k^2} E[x^T R R^T y x^T R R^T z] - E[\hat{\rho}_R(x, y)] E[\hat{\rho}_R(x, z)] \\ &= \frac{(k-1)\rho_{xy}\rho_{xz} + \rho_{yz} + 2\rho_{xy}\rho_{xz}}{k} - \rho_{xy}\rho_{xz} \\ &= \frac{1}{k} (\rho_{yz} + \rho_{xy}\rho_{xz}). \end{aligned}$$

□

### A.5 Proof of Proposition 1

*Proof.* To start with, we notice that for  $x_i, y_i, i = 1, \dots, k$  all *i.i.d.* standard normal,

$$F_{k,k}\left(\frac{1-\rho}{1+\rho}\right) = Pr\left[\sum_{i=1}^k x_i^2 \leq \frac{1-\rho}{1+\rho} \sum_{i=1}^k y_i^2\right] = Pr\left[\frac{1}{k} \sum_{i=1}^k x_i^2 \leq \frac{1-\rho}{1+\rho} \left(\frac{1}{k} \sum_{i=1}^k y_i^2\right)\right].$$

By Central Limit Theorem we have  $w = \frac{1}{k} \sum_{i=1}^k x_i^2 \sim N(1, 2/k)$ ,  $z = \frac{1}{k} \sum_{i=1}^k y_i^2 \sim N(1, 2/k)$  and they are independent. Hence, when  $k \rightarrow \infty$ , we have

$$\begin{aligned} f_k(\rho) &= F_{k,k}\left(\frac{1-\rho}{1+\rho}\right) = Pr[w \leq \frac{1-\rho}{1+\rho} z] \\ &= \int_{-\infty}^{\infty} \frac{\sqrt{k}}{2\sqrt{\pi}} e^{-\frac{k(z-1)^2}{4}} \int_{-\infty}^{\frac{1-\rho}{1+\rho} z} \frac{\sqrt{k}}{2\sqrt{\pi}} e^{-\frac{k(w-1)^2}{4}} dw dz \\ &= \int_{-\infty}^{\infty} \frac{\sqrt{k}}{2\sqrt{\pi}} e^{-\frac{k(z-1)^2}{4}} \Phi\left(\sqrt{\frac{k}{2}} \left(\frac{1-\rho}{1+\rho} z - 1\right)\right) dz \\ &= \int_{-\infty}^{\infty} \frac{1}{\sqrt{2\pi}} e^{-\frac{s^2}{2}} \Phi\left(\frac{(1-\rho)s - \sqrt{2k}\rho}{1+\rho}\right) ds \\ &= E_s\left[\Phi\left(\frac{(1-\rho)s - \sqrt{2k}\rho}{1+\rho}\right)\right], \end{aligned}$$

where the second and third line are derived by simple change of variable, and  $s \sim N(0, 1)$ . For another  $v \sim N(0, 1)$  independent of  $s$ , by law of total expectation we obtain

$$\begin{aligned} &E_s\left[\Phi\left(\frac{(1-\rho)s - \sqrt{2k}\rho}{1+\rho}\right)\right] \\ &= E_{s,v}\left[\mathbb{1}\left\{v \leq \frac{(1-\rho)s - \sqrt{2k}\rho}{1+\rho}\right\}\right] \\ &= Pr\left[v - \frac{1-\rho}{1+\rho}s \leq -\frac{\sqrt{2k}\rho}{1+\rho}\right] \\ &= Pr\left[\frac{v - \frac{(1-\rho)}{1+\rho}s}{\sqrt{1 + \frac{(1-\rho)^2}{(1+\rho)^2}}} \leq -\frac{\sqrt{2k}\rho}{(1+\rho)\sqrt{1 + \frac{(1-\rho)^2}{(1+\rho)^2}}}\right] \\ &= \Phi\left(-\frac{\sqrt{k}\rho}{\sqrt{1+\rho^2}}\right) = \tilde{f}_k(\rho). \end{aligned}$$

This completes the proof. □

### A.6 Proof of Theorem 5

*Proof.* The proof follows from [1]. First by classical VC theory [7], with probability  $1 - \delta$  we have

$$Pr[\hat{H}_Q(x) \neq y] \leq \hat{\mathcal{L}}_{(0,1)}(S_Q, \hat{h}_Q) + 2\sqrt{\frac{(k+1) \log \frac{2en}{k+1} + \log \frac{1}{\delta}}{n}},$$

where  $\hat{\mathcal{L}}_{(0,1)}(S_Q, \hat{h}_Q) = \frac{1}{n} \sum_{i=1}^n \mathcal{L}_{(0,1)}(\hat{H}_Q(Q(R^T x_i)), y_i)$  the empirical loss in the quantized space (with optimal ERM quantizer  $\hat{h}_Q$  in  $S_Q$ ). Since  $\hat{h}_Q$  is the minimizer of  $\hat{\mathcal{L}}_{(0,1)}(S_Q, \hat{h}_Q)$ , we

have

$$\begin{aligned}
\hat{\mathcal{L}}_{(0,1)}(S_Q, \hat{h}_Q) &\leq \hat{\mathcal{L}}_{(0,1)}(S_Q, Q(R^T \hat{h})) \\
&= \hat{\mathcal{L}}_{(0,1)}(S, \hat{h}) + (\hat{\mathcal{L}}_{(0,1)}(S_Q, Q(R^T \hat{h})) - \hat{\mathcal{L}}_{(0,1)}(S, \hat{h})) \\
&\leq \hat{\mathcal{L}}_{(0,1)}(S, \hat{h}) + \frac{1}{n} \sum_{i=1}^n \mathbb{I}\{\text{sign}(Q(\hat{h}^T R)Q(R^T x_i)) \neq \text{sign}(\hat{h}^T x_i)\} \\
&:= \hat{\mathcal{L}}_{(0,1)}(S, \hat{h}) + M.
\end{aligned}$$

We note that  $M$  is a sum of dependent flipping probabilities because of the commonly used projection matrix  $R$ . Using Markov's Inequality we have

$$M \leq (1 + \frac{1-\delta}{\delta}) E_R[M]$$

with probability  $1 - \delta$ . To get a better bound with small  $\delta$ , we make use of Lemma A2. By applying the lemma, if  $M^*$  is an independent copy of  $M$ , standard Chernoff bound gives

$$\Pr[M^* \geq (1 + \epsilon) E_R[M^*]] \leq \exp(-n E_R[M^*] \epsilon^2 / 3).$$

Then, Lemma A2 yields

$$\begin{aligned}
\Pr[M \geq (1 + \epsilon) E_R[M]] &\leq \exp(-n E_R[M^*] \epsilon^2 / 3)^{\frac{1}{n}} \\
&= \exp(-E_R[M] \epsilon^2 / 3).
\end{aligned}$$

Transforming probability bound to expectation bound, we obtain with probability  $1 - \delta$ ,

$$M \leq E_R[M] + \sqrt{3 E_R[M] \log \frac{1}{\delta}}.$$

The proof is completed by noting that  $E_R[M] = \sum_{i=1}^n \Phi(-\frac{\sqrt{k}|\rho_i|}{\xi_{\rho_i}})$  as  $k \rightarrow \infty$ , which could be easily derived from Central Limit Theorem and Proposition 1.

□

## A.7 Proof of Theorem 6

*Proof.* By applying Lemma A1 we have

$$E_{Y|R}[L_Q(\hat{\beta}_Q^*)] - L_Q(\beta_Q^*) \leq \gamma \frac{k}{n}. \quad (5)$$

Since  $\beta_Q^*$  is the minimizer of the squared loss in the quantized space, by elementary algebra we have that

$$\begin{aligned}
L_Q(\beta_Q^*) &\leq L_Q(\frac{1}{\sqrt{k}(1-D_Q)} R^T \beta^*) \\
&= \frac{1}{n} E_{Y|R}[\|Y - \frac{1}{k(1-D_Q)} Q(XR) R^T \beta^*\|^2] \\
&\stackrel{(a)}{=} \frac{1}{n} E_{Y|R}[\|Y - X\beta^*\|^2] + \frac{1}{n} \|X\beta^* - \frac{1}{k(1-D_Q)} Q(XR) R^T \beta^*\|^2 \\
&= L(\beta^*) + (\beta^*)^T \Sigma \beta^* - \frac{2}{nk(1-D_Q)} (\beta^*)^T RQ(XR)^T X\beta^* \\
&\quad + \frac{1}{nk^2(1-D_Q)^2} (\beta^*)^T RQ(XR)^T Q(XR) R^T \beta^*, \quad (6)
\end{aligned}$$

where (a) is due to  $Y - X\beta^* = \epsilon$  is *i.i.d* zero-mean Gaussian independent of  $R$ . Here, the factor  $\frac{1}{1-D_Q}$  is again related to cosine estimation, and we will provide some discussions at the end of the proof. Recall the notation  $X = [x_1, \dots, x_n]^T$  with  $x_i$  having unit norm, and  $R = [r_1, \dots, r_k]$ .

We denote  $z_{ip} \triangleq \langle x_i, r_p \rangle$ . Hence, the quantized matrix  $Q(XR)$  has  $z_{ip}$  as the  $(i, p)$ -th entry, for  $i = 1, \dots, n$  and  $p = 1, \dots, k$ . It is obvious that

$$\begin{pmatrix} z_{ip} \\ z_{jp} \end{pmatrix} \sim N\left(\begin{pmatrix} 0 \\ 0 \end{pmatrix}, \begin{pmatrix} 1 & \rho_{ij} \\ \rho_{ij} & 1 \end{pmatrix}\right), \quad (7)$$

where  $\rho_{ij} = \langle x_i, x_j \rangle$ . Moreover, Lemma A3 then gives  $E[z_{ip}Q(z_{jp})] = (1 - D_Q)\langle x_i, x_j \rangle$ . Further denote  $\tilde{\beta} = \beta^*/\|\beta^*\|$  the standardized true parameter vector. It follows that

$$\begin{aligned} E[(\beta^*)^T RQ(XR)^T X\beta^*] &= E[(\beta^*)^T RQ(XR)^T] X\beta^* \\ &= E\left[(\tilde{\beta})^T RQ(XR)^T\right] X\beta^* \|\beta^*\| \\ &= E\left[\left[\sum_{p=1}^k z_{\tilde{\beta},p} Q(z_{1p}), \dots, \sum_{p=1}^k z_{\tilde{\beta},p} Q(z_{np})\right]^T\right] X\beta^* \|\beta^*\| \\ &\stackrel{(b)}{=} k(1 - D_Q)(\beta^*)^T X^T X\beta^* \\ &= nk(1 - D_Q)(\beta^*)^T \Sigma \beta^*. \end{aligned} \quad (8)$$

Here,  $z_{\tilde{\beta},p} = \langle \tilde{\beta}, r_p \rangle$ , and (b) is due to Lemma A3. Note that for  $(x, y)$  following distribution (7) with cosine  $\rho$ , we have

$$\begin{aligned} E[x^2 Q(y)^2] &= E[(\rho y + \sqrt{1 - \rho^2} W)^2 Q(y)^2] \\ &= \rho^2 \xi_{2,2} + (1 - \rho^2)(1 - D_Q), \end{aligned} \quad (9)$$

where  $W \sim N(0, 1)$  is independent of  $x, y$ , and  $\xi_{2,2} \triangleq E[y^2 Q(y)^2]$  for  $y \sim N(0, 1)$ . Denote  $\rho_{\tilde{\beta},i} = \langle \tilde{\beta}, x_i \rangle$ . Now we can obtain

$$\begin{aligned} &E[(\beta^*)^T RQ(XR)^T Q(XR)R^T \beta^*] \\ &= \|\beta^*\|^2 E\left[\tilde{\beta}^T RQ(XR)^T Q(XR)R^T \tilde{\beta}\right] \\ &= \|\beta^*\|^2 E\left[\sum_{i=1}^n \left(\sum_{p=1}^k z_{\tilde{\beta},p} Q(z_{ip})\right)^2\right] \\ &= \|\beta^*\|^2 \sum_{i=1}^n E\left[\sum_{p=1}^k z_{\tilde{\beta},p}^2 Q(z_{ip})^2 + \sum_{p=1}^k \sum_{q \neq p}^k z_{\tilde{\beta},p} Q(z_{ip}) z_{\tilde{\beta},q} Q(z_{iq})\right] \\ &= \|\beta^*\|^2 \sum_{i=1}^n \left[k(\xi_{2,2} \rho_{\tilde{\beta},i}^2 + (1 - \rho_{\tilde{\beta},i}^2)(1 - D_Q)) + k(k-1)(1 - D_Q)^2 \rho_{\tilde{\beta},i}^2\right]. \end{aligned} \quad (10)$$

In the above, (10) holds because of (9) and the fact that  $z_{\tilde{\beta},p} Q(z_{ip})$  is independent of  $z_{\tilde{\beta},q} Q(z_{iq})$  for any  $p \neq q$ . By noticing that

$$\sum_{i=1}^n \rho_{\tilde{\beta},i}^2 = \frac{(\beta^*)^T X^T X \beta^*}{\|\beta^*\|^2} = \frac{n(\beta^*)^T \Sigma \beta^*}{\|\beta^*\|^2},$$

we can further have

$$\begin{aligned} &E[(\beta^*)^T RQ(XR)^T Q(XR)R^T \beta^*] \\ &= \|\beta^*\|^2 \left[ k(\xi_{2,2} \sum_{i=1}^n \rho_{\tilde{\beta},i}^2 + (n - \sum_{i=1}^n \rho_{\tilde{\beta},i}^2)(1 - D_Q)) + k(k-1)(1 - D_Q)^2 \sum_{i=1}^n \rho_{\tilde{\beta},i}^2 \right] \\ &= nk(1 - D_Q)\|\beta^*\|^2 + n[k(\xi_{2,2} - 1 + D_Q) + k(k-1)(1 - D_Q)^2] (\beta^*)^T \Sigma \beta^*. \end{aligned} \quad (11)$$

Now, taking expectation on both sides of (6) w.r.t.  $R$  and combining (8) and (11), we have

$$\begin{aligned} &E_R[L_Q(\beta_Q^*)] \\ &\leq L(\beta^*) + \left[1 - 2 + \frac{\xi_{2,2} - 1 + D_Q}{k(1 - D_Q)^2} + \frac{k-1}{k}\right] (\beta^*)^T \Sigma \beta^* + \frac{1}{k(1 - D_Q)} \|\beta^*\|^2 \\ &= L(\beta^*) + \frac{1}{k} \|\beta^*\|_\Omega^2, \end{aligned} \quad (12)$$



where  $\Omega = [\frac{\xi_{2,2}-1+D_Q}{(1-D_Q)^2} - 1]\Sigma + \frac{1}{1-D_Q}I_d$ , with  $\|\beta^*\|_\Omega = \sqrt{(\beta^*)^T \Omega \beta^*}$ , and  $I_d$  the identity matrix. Lastly, taking expectation *w.r.t.*  $\mathbf{R}$  in (5), we obtain

$$\begin{aligned} E_{Y,R}[L_Q(\hat{\beta}_Q^*)] &\leq E[L_Q(\beta_Q^*)] + \gamma \frac{k}{n} \\ &\leq \gamma \frac{k}{n} + L(\beta^*) + \frac{1}{k} \|\beta^*\|_\Omega^2. \end{aligned}$$

This completes the proof. Now we briefly discuss the role of factor  $\frac{1}{1-D_Q}$  in (6). Note that in our model,  $X\beta^* = \|\beta^*\|X\tilde{\beta} = \|\beta^*\|[\rho_{\tilde{\beta},1}, \dots, \rho_{\tilde{\beta},n}]^T$  can be regarded as the scaled cosine between data vectors and the true parameter, and  $Q(XR)R^T\beta^*$  is then a biased estimator of  $X\beta^*$  with mean equal to  $(1 - D_Q)X\beta^*$ , according to Lemma A3. Therefore, the factor  $\frac{1}{1-D_Q}$  acts as a debiasing operation—Similar in spirit to the previous analysis for classification problems.  $\square$

## References

- [1] Robert J. Durrant and Ata Kabán. Sharp generalization error bounds for randomly-projected classifiers. In *ICML*, pages 693–701, 2013.
- [2] László Györfi, Michael Kohler, Adam Krzyżak, and Harro Walk. *A Distribution-Free Theory of Nonparametric Regression*. Springer series in statistics. Springer, 2002.
- [3] Ata Kabán. A new look at nearest neighbours: Identifying benign input geometries via random projections. In *Proceedings of The 7th Asian Conference on Machine Learning (ACML)*, pages 65–80, Hong Kong, China, 2015.
- [4] Xiaoyun Li and Ping Li. Random projections with asymmetric quantization. In *Advances in Neural Information Processing Systems (NeurIPS)*, Vancouver, Canada, 2019.
- [5] Shai Shalev-Shwartz and Ben-David. *Understanding machine learning: From theory to algorithms*. Cambridge university press, 2014.
- [6] Alan Siegel. Toward a usable theory of chernoff bounds for heterogeneous and partially dependent random variables. *Technical Report.*, 1995.
- [7] Vladimir N. Vapnik. *The Nature of Statistical Learning Theory*. Springer-Verlag Inc, New York, 1995.
